# Supplementary material
Source: MDPI journal article supplement (https://www.mdpi.com/2072-4292/13/15/2907)
Supplement: s1 [file s1]

Archive with 4 entries (4 files):
- s1.jpg
- s2.jpg
- s3.jpg
- S_4to17.pdf
