# Supplementary material
Source: MDPI journal article supplement (https://www.mdpi.com/2072-4292/13/15/2907)

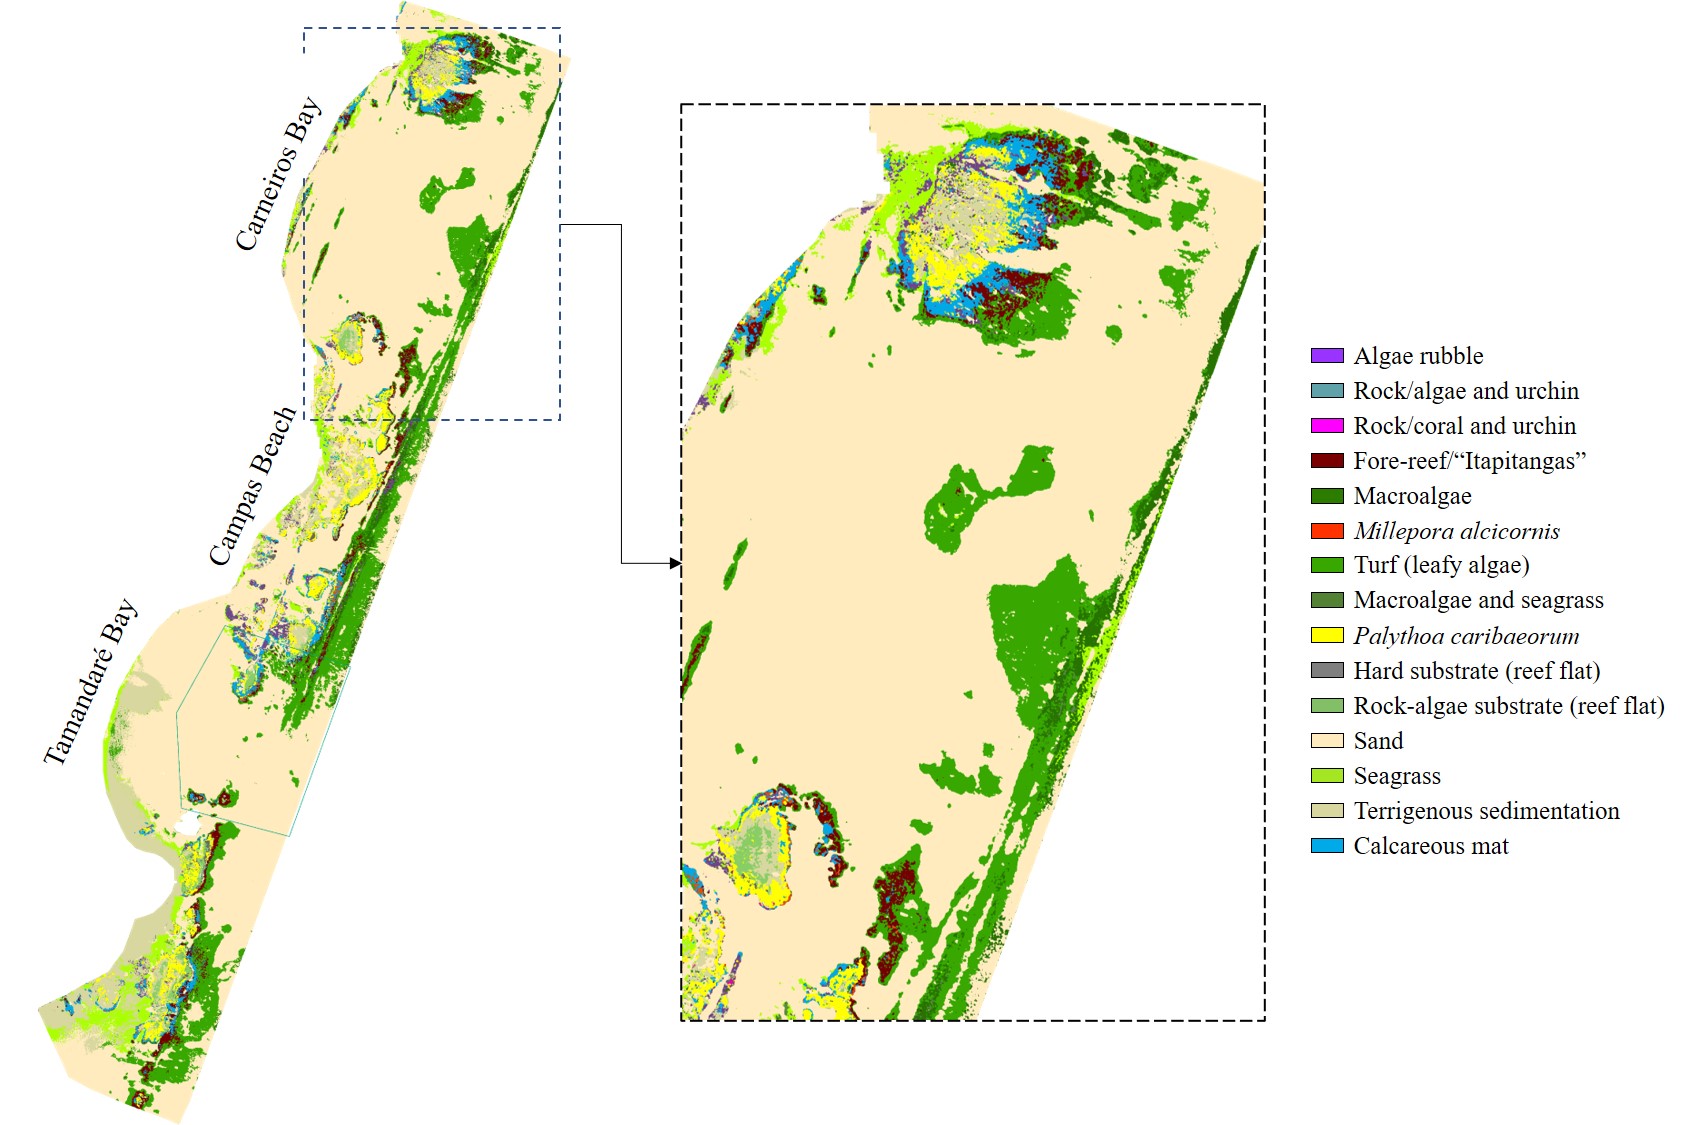

Supplement: s1 [file s1 › s1.jpg]

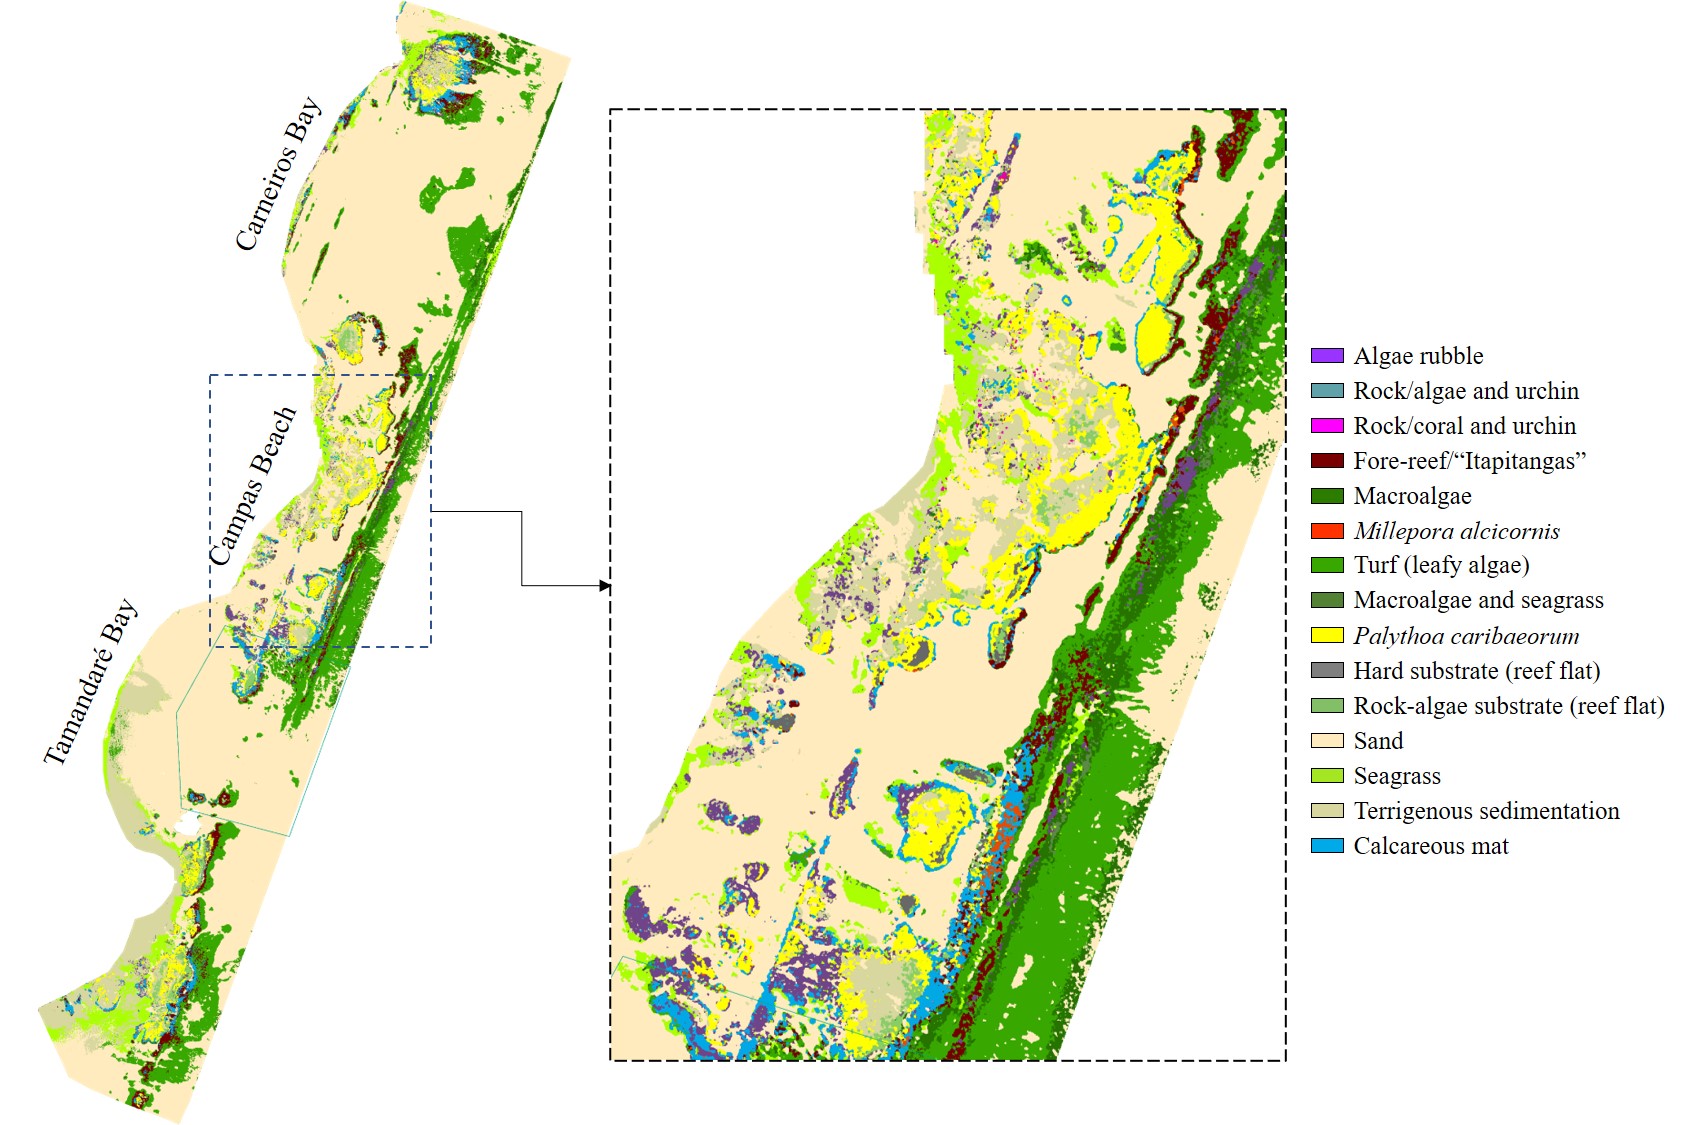

Supplement: s1 [file s1 › s2.jpg]

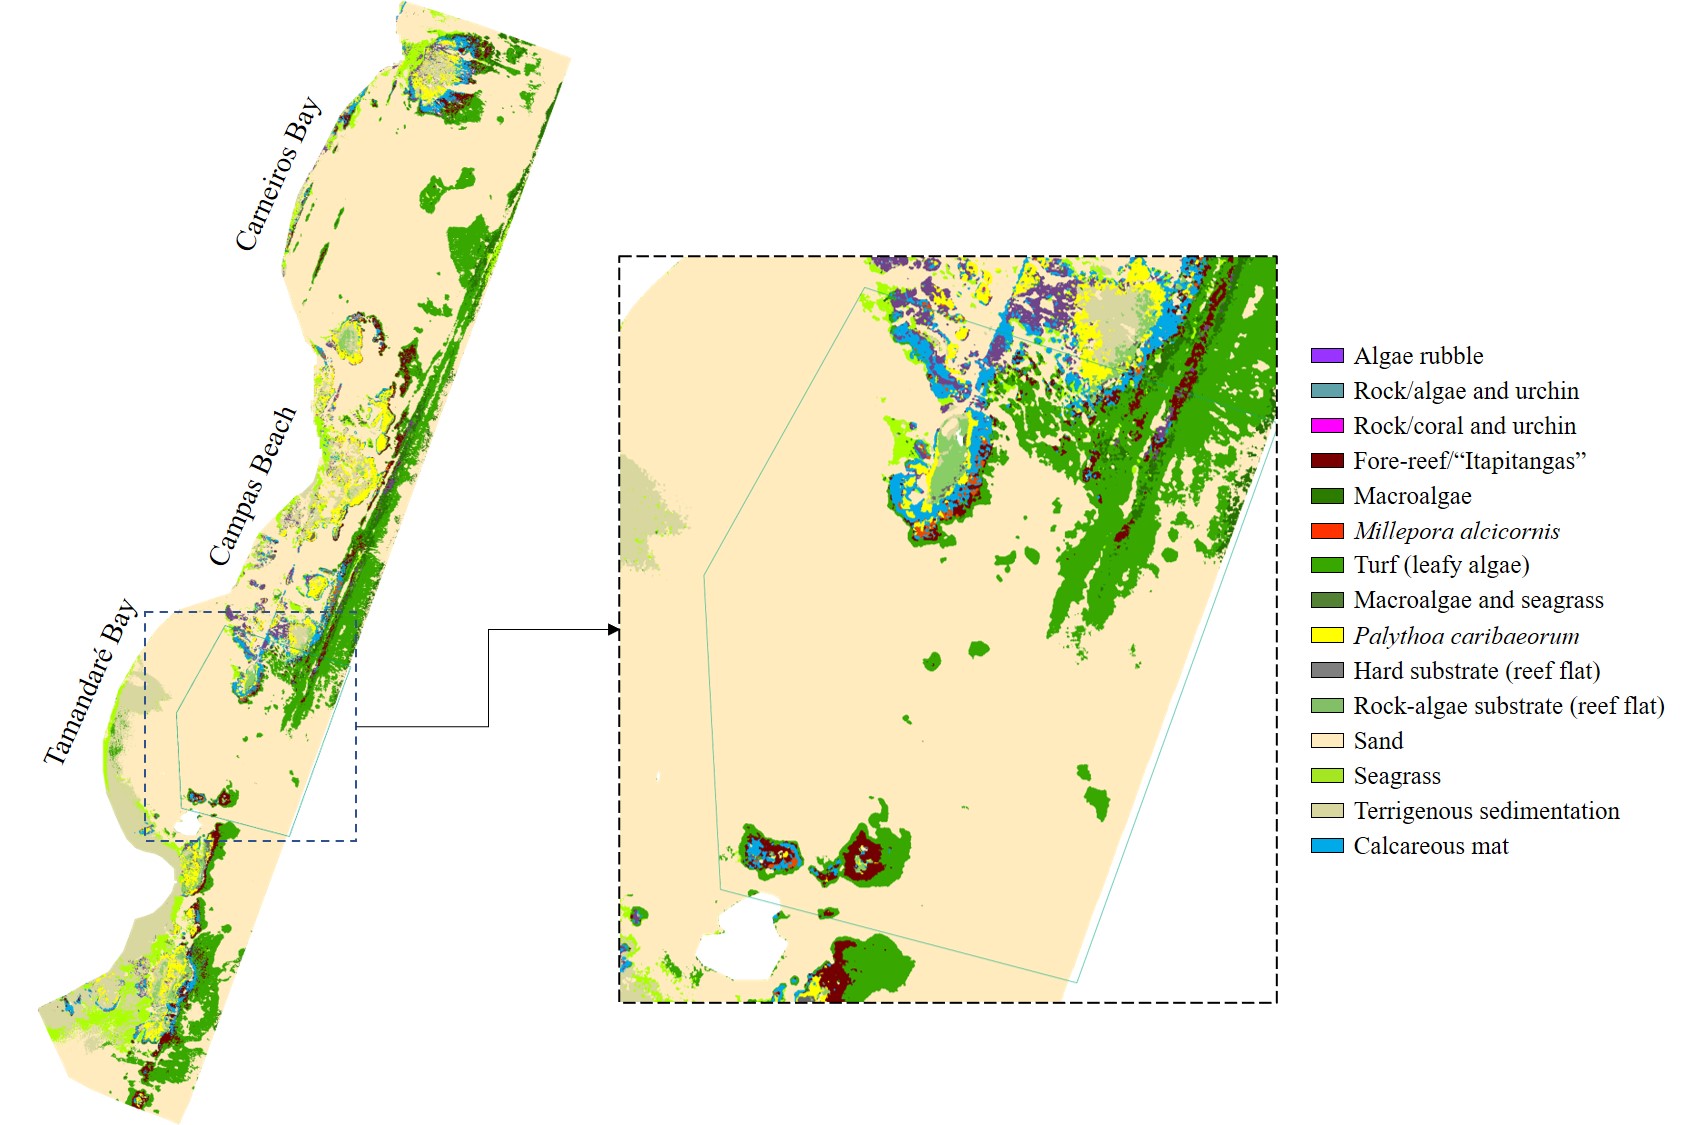

Supplement: s1 [file s1 › s3.jpg]
